# Supplementary material for: A Disease Identification Algorithm for Medical Crowdfunding Campaigns: Validation Study
Source: PubMed Central journal article supplement (PMC9257615; doi:10.2196/32867), 2022-06-21
Supplement: jmir_v24i6e32867_app1.pdf [file jmir_v24i6e32867_app1.pdf]

## Multimedia Appendix 1. Reassigned CCSR categories.

| <b>CCSR clinical category</b>                | <b>Original ICD-10-CM diagnosis chapter</b>                          | <b>Reassigned ICD-10-CM diagnosis chapter</b>                |
|----------------------------------------------|----------------------------------------------------------------------|--------------------------------------------------------------|
| Cardiac and circulatory congenital anomalies | Congenital Malformations, Deformations and Chromosomal Abnormalities | Diseases of the Circulatory System                           |
| Transient cerebral ischemia                  | Diseases of the Nervous System                                       | Diseases of the Circulatory System                           |
| Hepatitis                                    | Certain Infectious and Parasitic Diseases                            | Diseases of the Digestive System                             |
| Digestive congenital anomalies               | Congenital Malformations, Deformations and Chromosomal Abnormalities | Diseases of the Digestive System                             |
| Neonatal digestive and feeding disorders     | Certain Conditions Originating in the Perinatal Period               | Diseases of the Digestive System                             |
| Genitourinary congenital anomalies           | Congenital Malformations, Deformations and Chromosomal Abnormalities | Diseases of the Genitourinary System                         |
| Perinatal infections                         | Certain Conditions Originating in the Perinatal Period               | Certain Infectious and Parasitic Diseases                    |
| Musculoskeletal congenital conditions        | Congenital Malformations, Deformations and Chromosomal Abnormalities | Diseases of the Musculoskeletal System and Connective Tissue |
| Nervous system congenital anomalies          | Congenital Malformations, Deformations and Chromosomal Abnormalities | Diseases of the Nervous System                               |
| Neonatal cerebral disorders                  | Certain Conditions Originating in the Perinatal Period               | Diseases of the Nervous System                               |
| Respiratory congenital malformations         | Congenital Malformations, Deformations and Chromosomal Abnormalities | Diseases of the Respiratory System                           |
| Respiratory distress syndrome                | Certain Conditions Originating in the Perinatal Period               | Diseases of the Respiratory System                           |
| Respiratory perinatal condition              | Certain Conditions Originating in the Perinatal Period               | Diseases of the Respiratory System                           |
| Disorders of teeth and gingiva <sup>a</sup>  | Diseases of the Digestive System                                     | Other                                                        |

- a. ICD-10-CM codes in this CCSR clinical category were not reassigned to a particular diagnosis chapter; rather, they flagged for removal with ICD-10-CM codes assigned to the “Other” disease category.
