# Supplementary material for: A Disease Identification Algorithm for Medical Crowdfunding Campaigns: Validation Study
Source: PubMed Central journal article supplement (PMC9257615; doi:10.2196/32867), 2022-06-21
Supplement: jmir_v24i6e32867_app2.pdf [file jmir_v24i6e32867_app2.pdf]

## Multimedia Appendix 2. Disease category assignment from diagnosis chapters.

| <b>ICD-10-CM diagnosis chapter</b>                                                                  | <b>Disease category<sup>a</sup></b> |
|-----------------------------------------------------------------------------------------------------|-------------------------------------|
| Diseases of the Circulatory System                                                                  | Cardiovascular diseases             |
| Endocrine, Nutritional and Metabolic Diseases                                                       | Endocrine diseases                  |
| Diseases of the Digestive System                                                                    | Gastrointestinal diseases           |
| Diseases of the Genitourinary System                                                                | Genitourinary diseases              |
| Certain Infectious and Parasitic Diseases                                                           | Infections                          |
| Injury, Poisoning and Certain Other Consequences of External Causes                                 | Injuries and external causes        |
| Mental, Behavioral and Neurodevelopmental Disorders                                                 | Mental health disorders             |
| Diseases of the Musculoskeletal System and Connective Tissue                                        | Musculoskeletal diseases            |
| Neoplasms                                                                                           | Neoplasms                           |
| Diseases of the Nervous System                                                                      | Nervous system diseases             |
| Diseases of the Respiratory System                                                                  | Respiratory diseases                |
| Factors Influencing Health Status and Contact with Health Services                                  | Other                               |
| Symptoms, Signs and Abnormal Clinical and Laboratory Findings, Not Elsewhere Classified             | Other                               |
| Unacceptable principal diagnosis (inpatient data) or first-listed diagnosis (outpatient data)       | Other                               |
| Diseases of the Blood and Blood Forming Organs and Certain Disorders Involving the Immune Mechanism | Other                               |
| Diseases of the Ear and Mastoid Process                                                             | Other                               |
| Diseases of the Eye and Adnexa                                                                      | Other                               |
| Congenital Malformations, Deformations and Chromosomal Abnormalities                                | Other                               |
| Diseases of the Skin and Subcutaneous Tissue                                                        | Other                               |
| Certain Conditions Originating in the Perinatal Period                                              | Other                               |
| Pregnancy, Childbirth and the Puerperium                                                            | Other                               |

a. ICD-10-CM diagnosis chapters were renamed to distinguish the reclassified disease categories from the official ICD-10-CM and CCSR data.
