# Supplementary material for: A Disease Identification Algorithm for Medical Crowdfunding Campaigns: Validation Study
Source: PubMed Central journal article supplement (PMC9257615; doi:10.2196/32867), 2022-06-21

Campaigns with disease categories found exclusively by word search

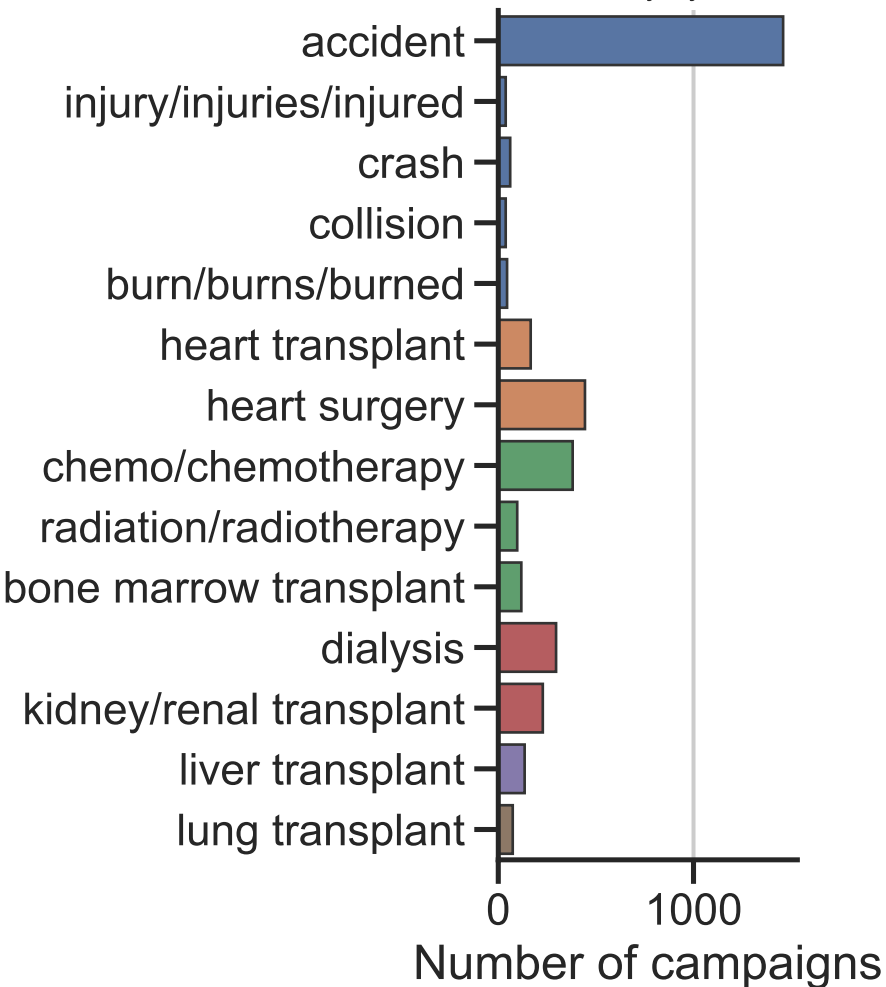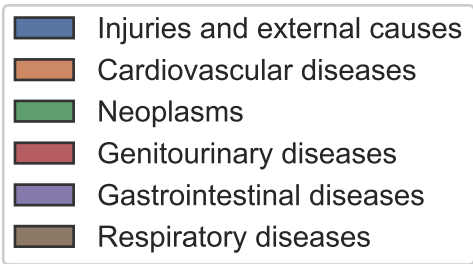

Campaigns with disease categories also found by NER model

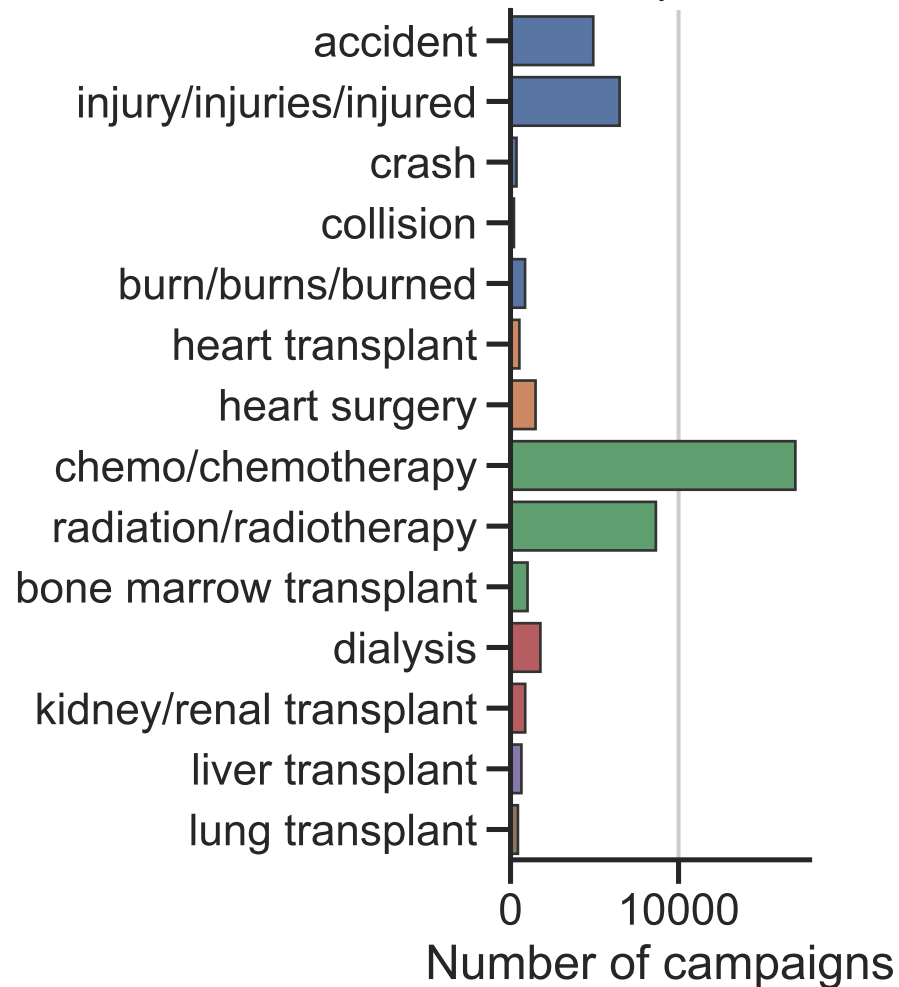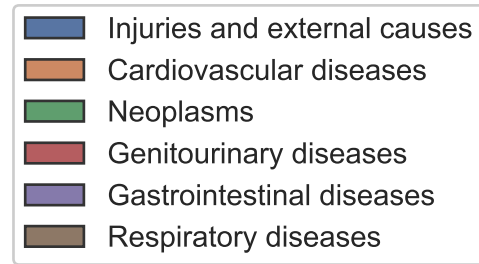

Supplement: jmir_v24i6e32867_app5.pdf [file jmir_v24i6e32867_app5.pdf]
