# Supplementary material for: A Disease Identification Algorithm for Medical Crowdfunding Campaigns: Validation Study
Source: PubMed Central journal article supplement (PMC9257615; doi:10.2196/32867), 2022-06-21
Supplement: jmir_v24i6e32867_app6.pdf [file jmir_v24i6e32867_app6.pdf]

**Multimedia Appendix 6. Inter-rater reliability for detecting broad disease categories in campaign description.**

| <b>Disease category</b>      | <b>Cohen's kappa</b> |
|------------------------------|----------------------|
| Neoplasms                    | 0.96                 |
| Infections                   | 0.93                 |
| Endocrine diseases           | 0.91                 |
| Injuries and external causes | 0.89                 |
| Cardiovascular diseases      | 0.88                 |
| Genitourinary diseases       | 0.85                 |
| Musculoskeletal diseases     | 0.85                 |
| Respiratory diseases         | 0.85                 |
| Mental health disorders      | 0.84                 |
| Nervous system diseases      | 0.76                 |
| Gastrointestinal diseases    | 0.69                 |
