# Supplementary material for: A Disease Identification Algorithm for Medical Crowdfunding Campaigns: Validation Study
Source: PubMed Central journal article supplement (PMC9257615; doi:10.2196/32867), 2022-06-21
Supplement: jmir_v24i6e32867_app7.pdf [file jmir_v24i6e32867_app7.pdf]

**Multimedia Appendix 7. Classification concordance between disease identification algorithm and annotated reference set.**

| <b>Disease category</b>      | <b>True positives</b> | <b>False positives</b> | <b>True negatives</b> | <b>False negatives</b> |
|------------------------------|-----------------------|------------------------|-----------------------|------------------------|
| Cardiovascular diseases      | 61                    | 5                      | 313                   | 21                     |
| Endocrine diseases           | 12                    | 4                      | 377                   | 7                      |
| Gastrointestinal diseases    | 10                    | 8                      | 374                   | 8                      |
| Genitourinary diseases       | 28                    | 1                      | 364                   | 7                      |
| Infections                   | 23                    | 18                     | 352                   | 7                      |
| Injuries and external causes | 49                    | 22                     | 325                   | 4                      |
| Mental health disorders      | 14                    | 15                     | 365                   | 6                      |
| Musculoskeletal diseases     | 23                    | 13                     | 342                   | 22                     |
| Neoplasms                    | 159                   | 9                      | 229                   | 3                      |
| Nervous system diseases      | 28                    | 4                      | 330                   | 38                     |
| Respiratory diseases         | 22                    | 2                      | 369                   | 7                      |
